# Supplementary material for: Conformational diversity facilitates antibody mutation trajectories and discrimination between foreign and self-antigens
Source: PubMed Central journal article supplement (PMC7486785; doi:10.1073/pnas.2005102117), 2020-08-27
Supplement: pnas.2005102117.sapp.pdf [file pnas.2005102117.sapp.pdf]

Supplementary Information for

## Conformational diversity facilitates antibody mutation trajectories and discrimination between foreign and self antigens

Deborah L. Burnett<sup>†1,2</sup>, Peter Schofield<sup>†1,2</sup>, David B. Langley<sup>†1</sup>, Jennifer Jackson<sup>1</sup>, Katherine Bourne<sup>1</sup>, Emily Wilson<sup>3</sup>, Benjamin T. Porebski<sup>4</sup>, Ashley M. Buckle<sup>3</sup>, Robert Brink<sup>1,2</sup>, Christopher C. Goodnow<sup>1,2,5\*</sup> and Daniel Christ<sup>1,2\*</sup>.

<sup>1</sup> Garvan Institute of Medical Research, UNSW Sydney, 384 Victoria Street, Darlinghurst NSW 2010, Australia

<sup>2</sup> UNSW Sydney, NSW, Australia.

<sup>3</sup> Department of Biochemistry and Molecular Biology, Biomedicine Discovery Institute, Monash University, Clayton VIC 3168, Australia

<sup>4</sup> Medical Research Council Laboratory of Molecular Biology, Francis Crick Avenue, Cambridge CB2 0QH, UK

<sup>5</sup> UNSW Cellular Genomics Futures Institute, UNSW Sydney, NSW, Australia.

<sup>†</sup> Authors contributed equally.

\* Christopher C. Goodnow and Daniel Christ

**Email:** c.goodnow@garvan.org.au (C.C.G.); d.christ@garvan.org.au (D.C.).

### **This PDF file includes:**

Supplementary text  
Figures S1 to S7  
Tables S1 to S2

### **Other supplementary materials for this manuscript include the following:**

Movies S1

Self (HEL<sup>3X</sup>)/DEL (25 mismatches as sticks)

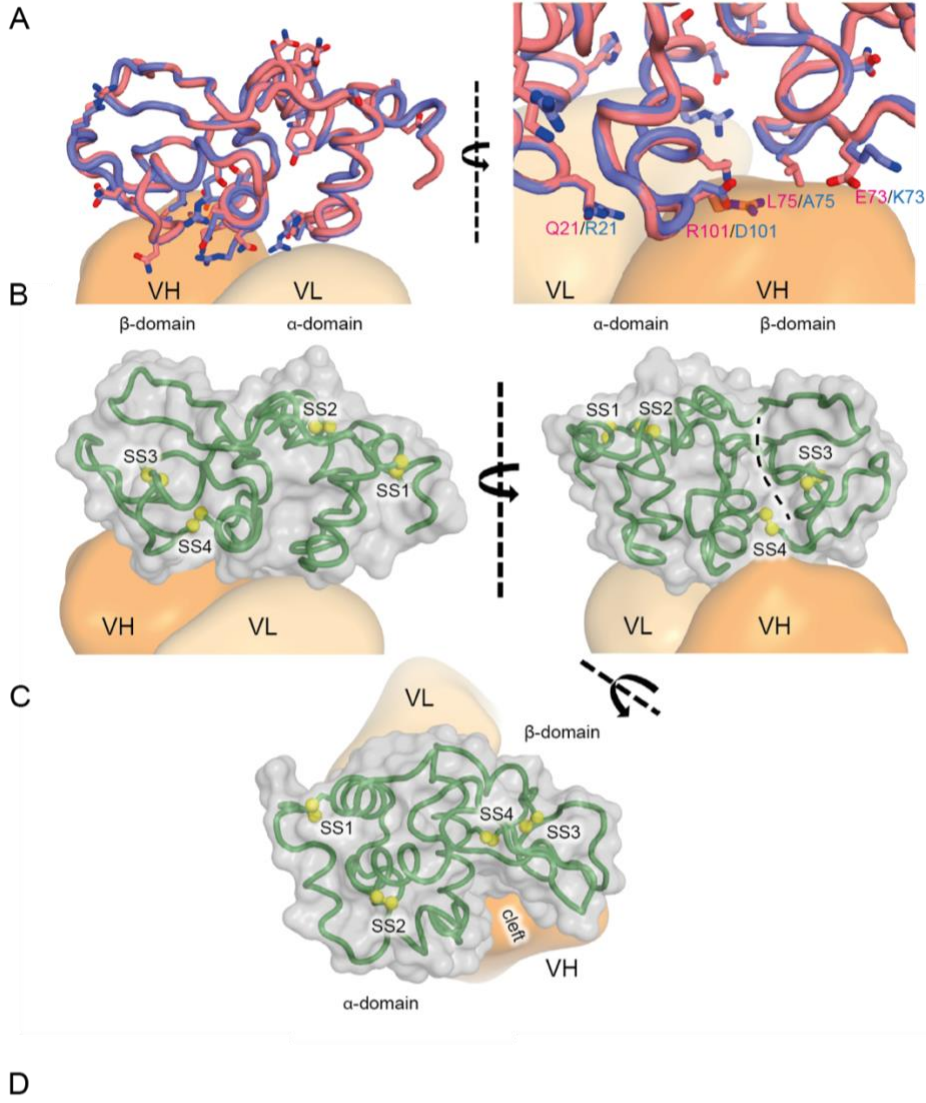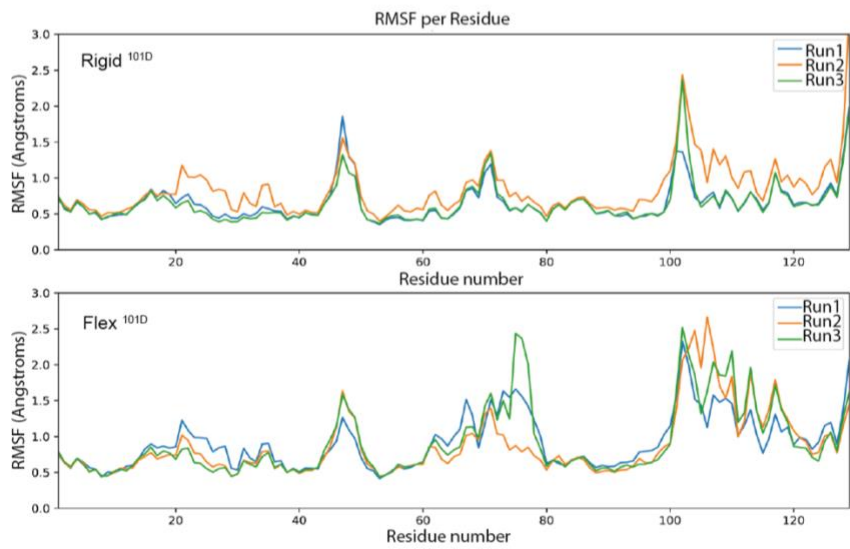

**Fig. S1. Structure of HEL<sub>3x</sub> self-lysozyme and molecular dynamics (MD) simulations of a flexible antigen variant. (A)** Structural similarity between self-lysozyme HEL<sub>3x</sub> (red cartoon and sticks, PDB entry 6p4d) and foreign DEL (blue cartoon and sticks, PDB entry 5v8g). Positions 21, 73 and 101 distinguish HEL<sub>3x</sub> from wild-type HEL. Position 75 is the crucial surface difference between the HEL<sub>3x</sub> and DEL lysozyme exploited by mutating Hy10 B cells. Positions of amino acid differences are indicated by stick representation of side chains. **(B-C)** Relative positions of the four lysozyme disulfides. Lysozyme contains four disulfide bonds (SS1-SS4), distributed such that two reside in the  $\alpha$ -domain, one in the  $\beta$ -domain, with the last, SS4, bridging between these two domains. Sulfur atoms of cysteine residues are shown as yellow spheres. **(D)** Root mean square fluctuation calculated for each residue of Rigid<sub>R101D</sub> and Flex<sub>R101D</sub> using three independent molecular dynamics simulations (1  $\mu$ s each).

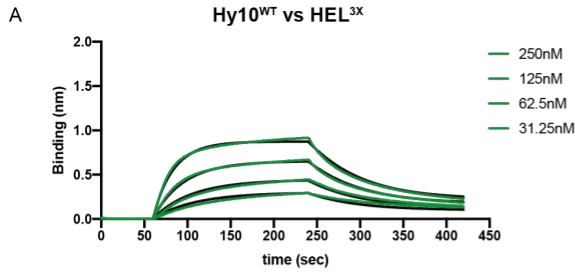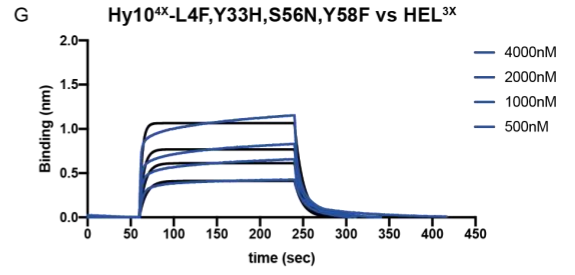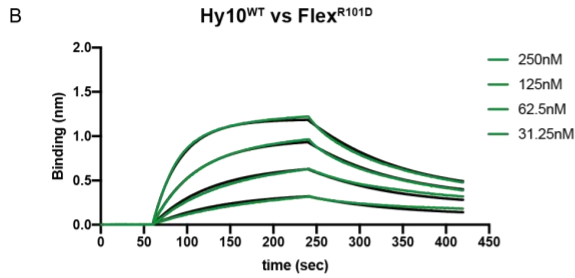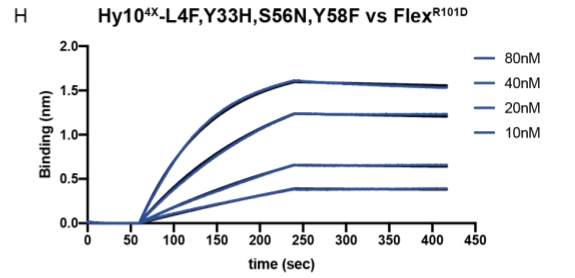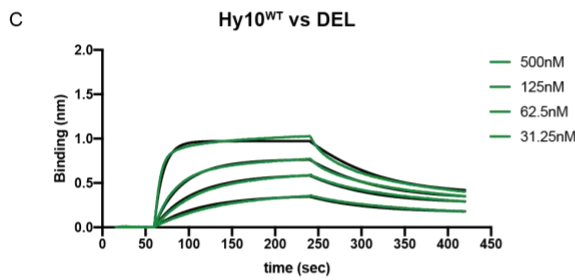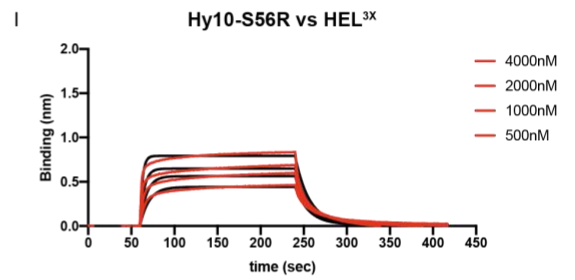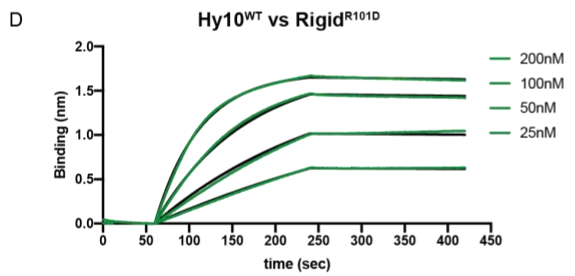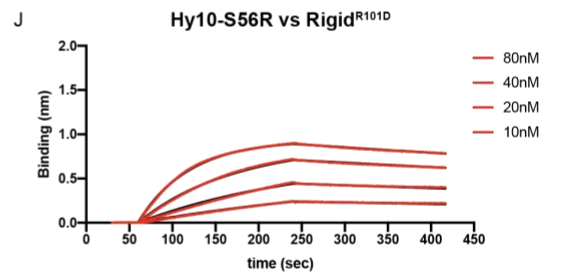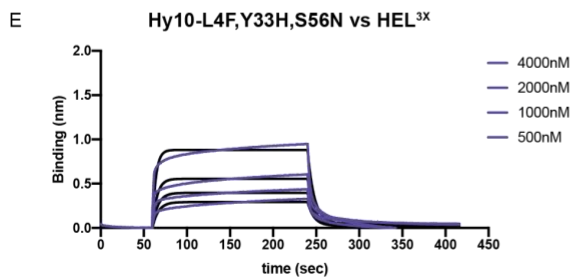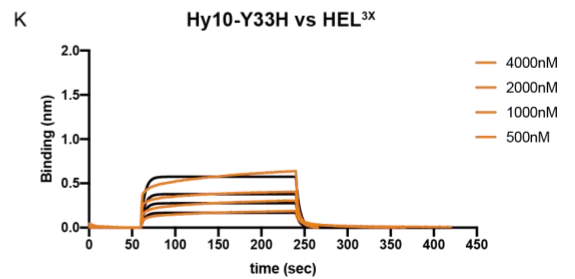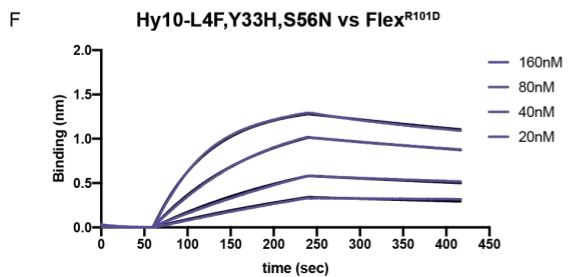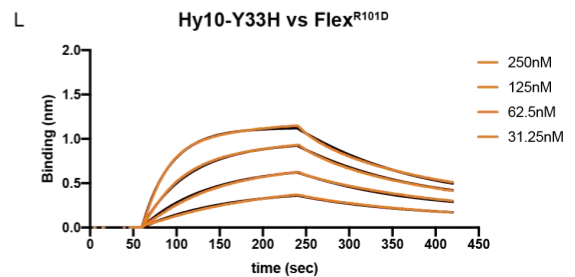

**Fig. S2. Bio-layer interferometry.** Experimental curves of association and disassociation of soluble monomeric protein antigens at the indicated concentrations binding to biotinylated Hy10 antibody Fab mutants immobilized onto streptavidin biosensors. Global fits are overlaid in black.

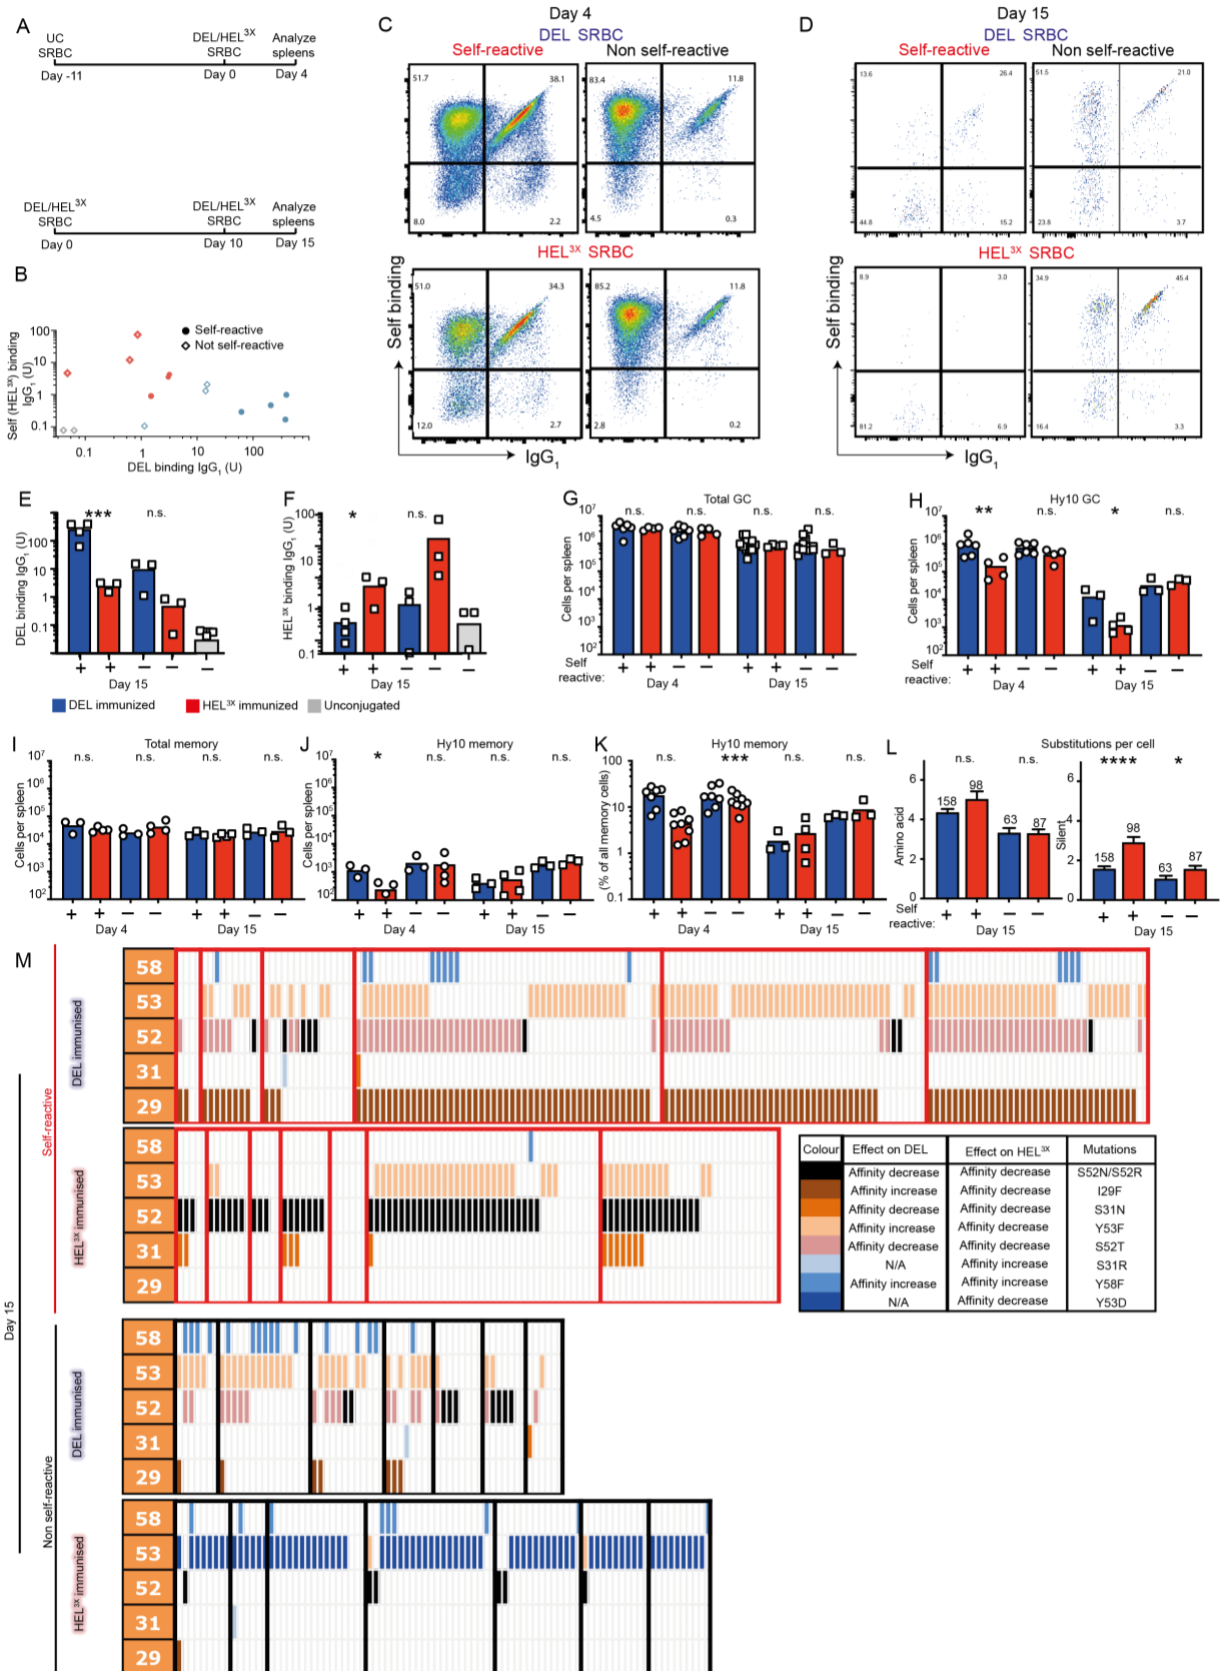

**Fig S3. Autoantibody redemption requires a path for escape of self-reactivity.** (A) Timing of chimera immunizations. (B) Total serum HEL<sub>3x</sub> or DEL binding IgG<sub>1</sub> from chimeras harvested on day 15 after antigen exposure. (C-D) Representative flow cytometric analysis of binding to self (0.14uM HEL<sub>3x</sub>) and cell surface IgG<sub>1</sub> of CD45.1+ GC B cells 4 (C) and 15 (D) days post immunization with the indicated antigens. (E) Total serum DEL binding IgG<sub>1</sub> from chimeras harvested on day 15 following antigen exposure. (F) Total serum HEL<sub>3x</sub> binding IgG<sub>1</sub> from chimeras harvested on day 15 following antigen exposure. (G) Total GC cells (B220+Fas+CD38-) per spleen from individual mice at the indicated timepoints post antigen exposure. (H) Total SW<sub>HEL</sub> GC cells (B220+Fas+CD38-CD45.1+CD45.2-) per spleen from individual mice at the indicated timepoints post antigen exposure. (I) Total IgG<sub>1</sub> memory cells (B220+Fas-CD38+IgG<sub>1</sub>+) per spleen from individual mice at the indicated timepoints post antigen exposure. (J) Total SW<sub>HEL</sub> IgG<sub>1</sub> memory cells (B220+Fas-CD38+IgG<sub>1</sub>+CD45.1+CD45.2-) per spleen from individual mice at the indicated timepoints post antigen exposure. (K) Percentage of SW<sub>HEL</sub> cells amongst IgG<sub>1</sub> memory B-Cells from mice with or without self-HEL<sub>3x</sub> immunized at the indicated timepoints after antigen exposure. (L) Average numbers of synonymous mutations and non-synonymous per Hy10 B GC cell at day 15. (M) Summary of mutations at H-chain I29, S31, S52, Y53, and Y58 in individual sorted Hy10 GC B cells. Color coding denotes the consequence of each mutation for self-affinity. Each column represents a single cell, each row denotes whether that cell has a mutation at the indicated amino acid position, and all the cells from a single mouse are grouped within red or black boxes. Data pooled from 2-3 independent experiments per timepoint with 1-4 mice per group. \*P<0.05, \*\*P<0.01, \*\*\*P<0.001, \*\*\*\*P<0.001 by Student's T test. Each data point represents a single mouse.

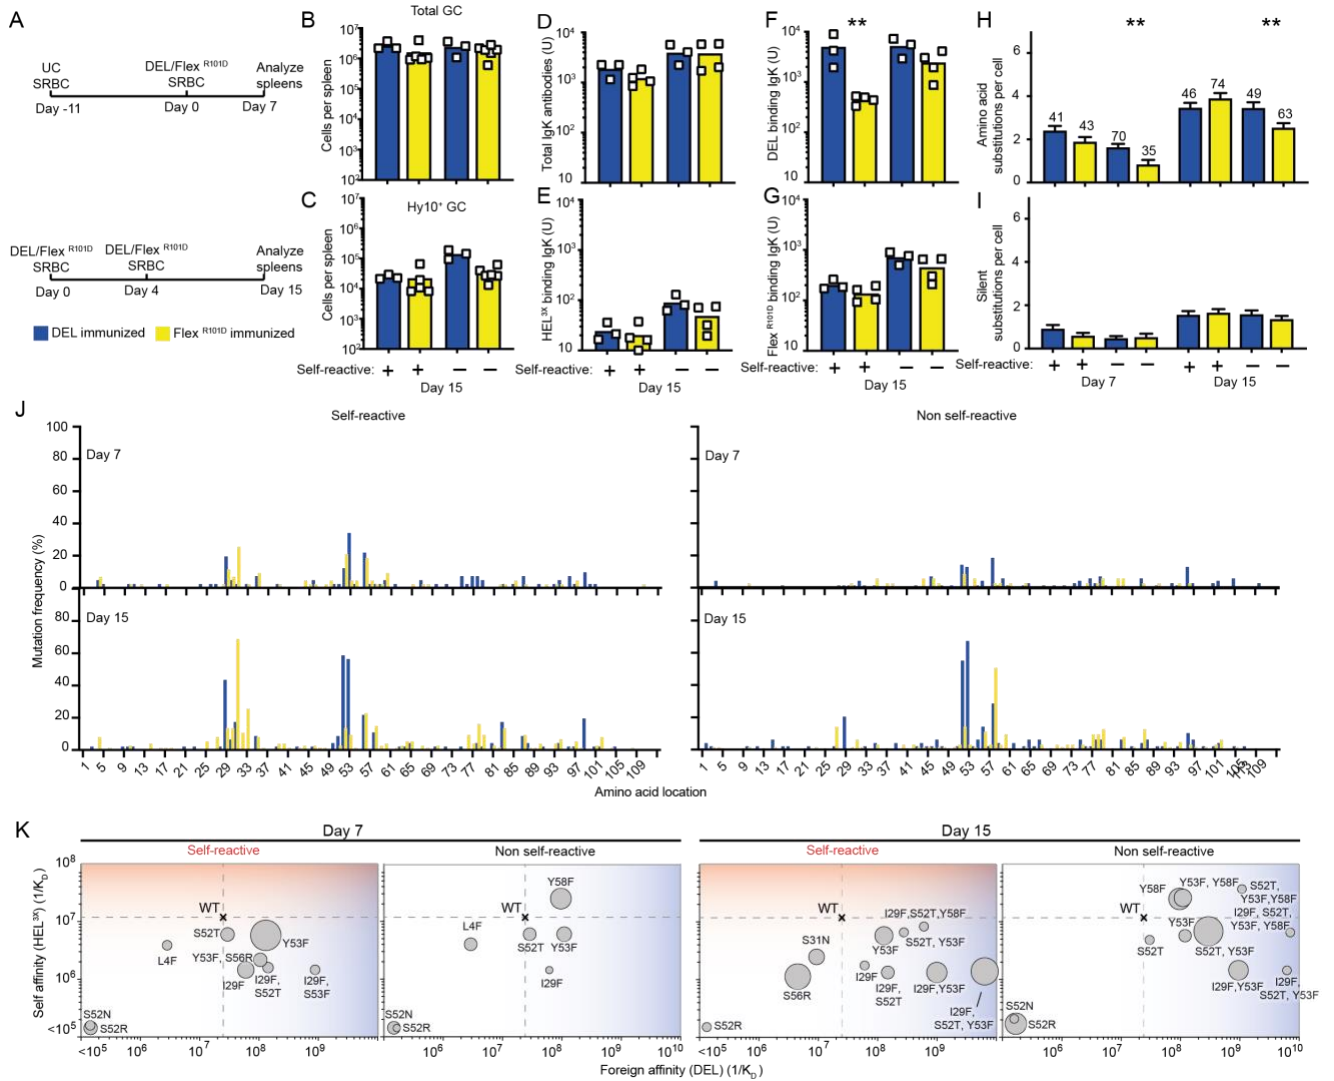

**Fig. S4. Autoantibody redemption against a flexible antigen (I).** (A) Timing of chimera immunizations. (B) Total GC cells (B220+Fas+CD38<sup>-</sup>) per spleen from individual mice at 15 days post antigen exposure. (C) Total SW<sub>HEL</sub> GC (B220+Fas+CD38<sup>-</sup>CD45.1+CD45.2<sup>-</sup>) per spleen from individual mice at 15 days post antigen exposure. (D) Total serum IgK from chimeras harvested on day 15 following antigen exposure. (E) Total HEL<sub>3x</sub> binding serum IgK from chimeras harvested on day 15 following antigen exposure. (F) Total DEL binding serum IgK from chimeras harvested on day 15 following antigen exposure. (G) Total Flex<sup>R101D</sup> binding serum IgK from chimeras harvested on day 15 following antigen exposure. (H) Average numbers of synonymous mutations per GC Hy10 B cell. (I) Average numbers of non-synonymous mutations per CD45.1<sup>+</sup> GC B cell. \*\*P<0.01 Student's T test. Data points represent one mouse. (J) Percentage of CD45.1<sup>+</sup> GC B cells with substitutions at each H-chain amino acid. (K) Mutational trajectory of Hy10-expressing B cells towards self and foreign antigens following DEL immunization. Circles show the affinity of recurring mutant antibodies for self and foreign proteins, with area denoting the percentage of Hy10 B-cells with the indicated mutation. Data represents 2 independent experiments per timepoint with 1-2 mice per group.



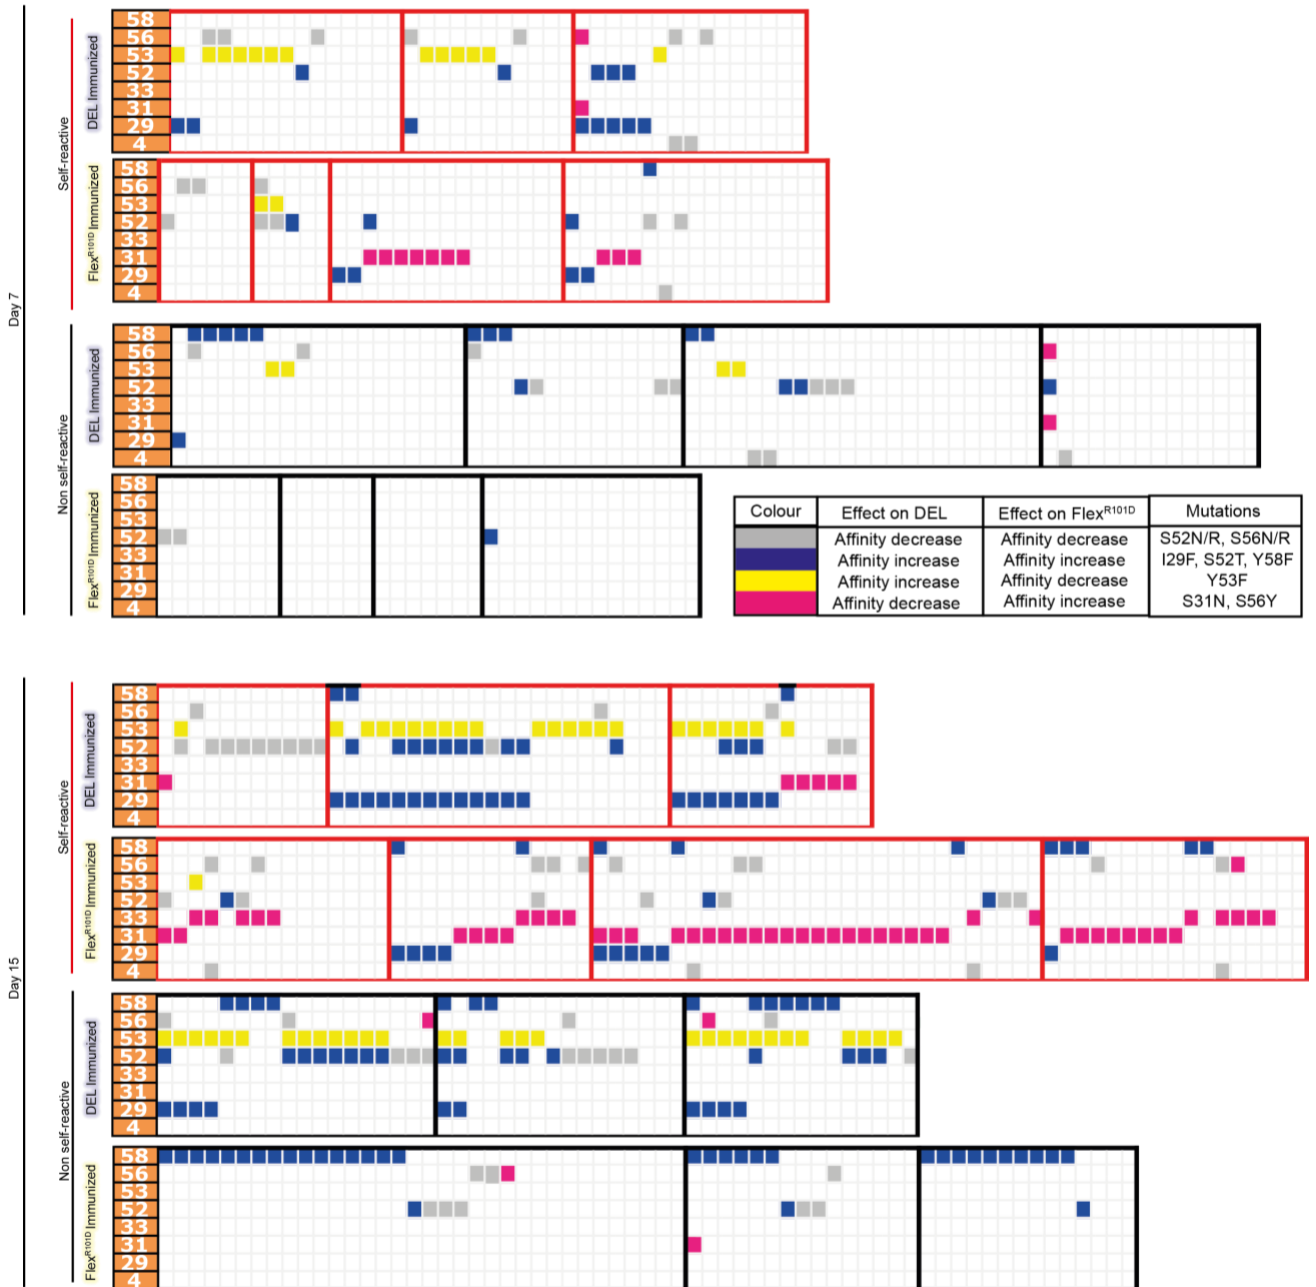

**Fig. S5. Autoantibody redemption against a flexible antigen (II).** Summary of mutations at H-chain L4, I29, S31, Y33 S52, Y53, S56 and Y58 in individual sorted CD45.1+ GC B cells. Color coding denotes the consequence of each mutation for DEL and Flex<sup>R101D</sup> affinity. Each column represents a single cell, each row denotes whether that cell has a mutation at the indicated amino acid position, and all the cells from a single mouse are grouped within red or black boxes. Data representative of 3 independent experiments with 3-4 mice per group.

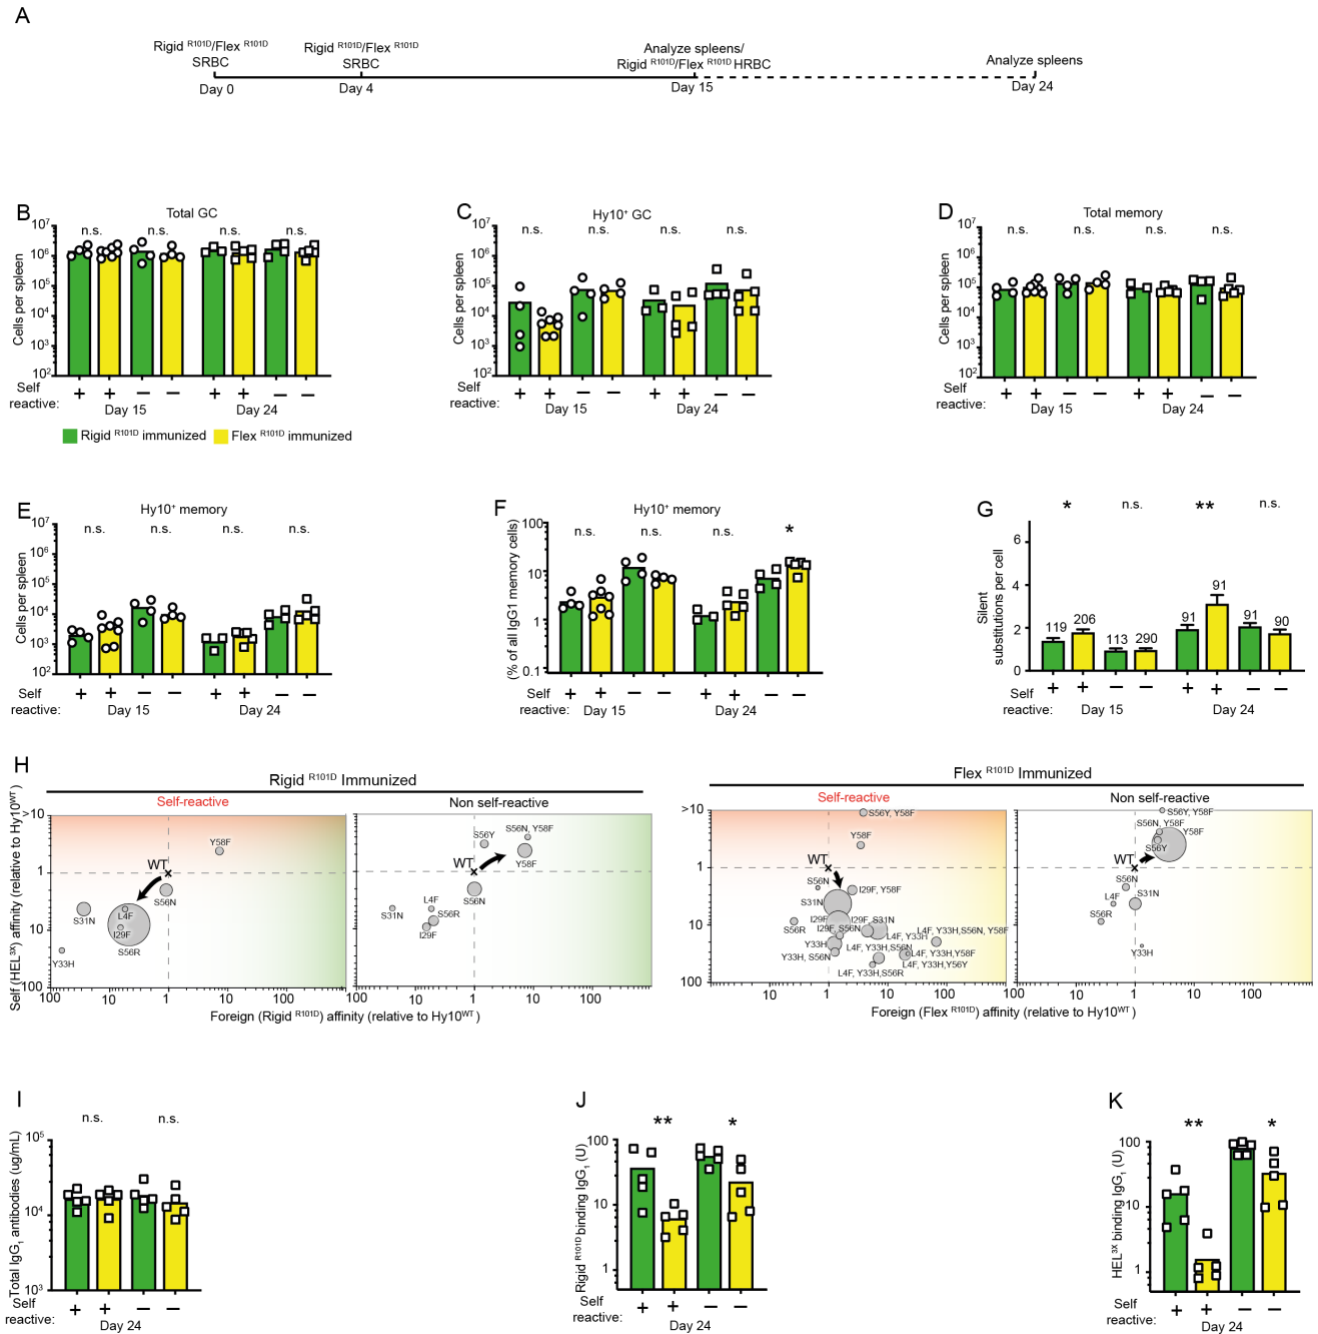

**Fig. S6. Antigen flexibility enables B cells to explore diverse mutational trajectories leading to loss of self-reactivity and high affinity for foreign antigen (I).** (A) Timing of chimera immunizations. (B) Total GC cells (B220+Fas+CD38-) per spleen from individual mice at the indicated timepoints post antigen exposure. (C) Total SW<sub>HEL</sub> GC (B220+Fas+CD38-CD45.1+CD45.2-) per spleen from individual mice at 15 days post antigen exposure. (D) Total IgG<sub>1</sub> memory cells (B220+Fas-CD38+IgG<sub>1</sub>+) per spleen from individual mice at the indicated timepoints post antigen exposure. (E) Total SW<sub>HEL</sub> IgG<sub>1</sub> memory cells (B220+Fas-CD38+IgG<sub>1</sub>+CD45.1+CD45.2-) per spleen from individual mice at the indicated timepoints post antigen exposure. (F) Percentage of SW<sub>HEL</sub> cells amongst IgG<sub>1</sub> memory B-Cells from mice with or without self-HEL<sub>3X</sub> immunized with Flex<sup>R101D</sup> or Rigid<sup>R101D</sup> at the indicated timepoints after antigen exposure. (G) Average number of non-synonymous mutations per CD45.1+ GC B cell. (H) Mutational trajectory of Hy10-expressing GC B cells at day 15 relative to Hy10 founding affinity.

Circles show the affinity of recurring mutant antibodies for self and foreign proteins, with area denoting the percentage of CD45.1<sup>+</sup> GC B-cells with the indicated mutation. (I) Total serum IgG<sub>1</sub> from chimeras harvested on day 15 following antigen exposure. (J) Total Rigid<sub>R101D</sub> binding serum IgG<sub>1</sub> from chimeras harvested on day 15 following antigen exposure. (K) Total HEL<sub>3X</sub> binding serum IgG<sub>1</sub> from chimeras harvested on day 15 following antigen exposure. \*P<0.05,\*\*P<0.01 Student's T test. Data points represent one mouse. Data representative of 2 independent experiments per timepoint with 2-3 mice per group.

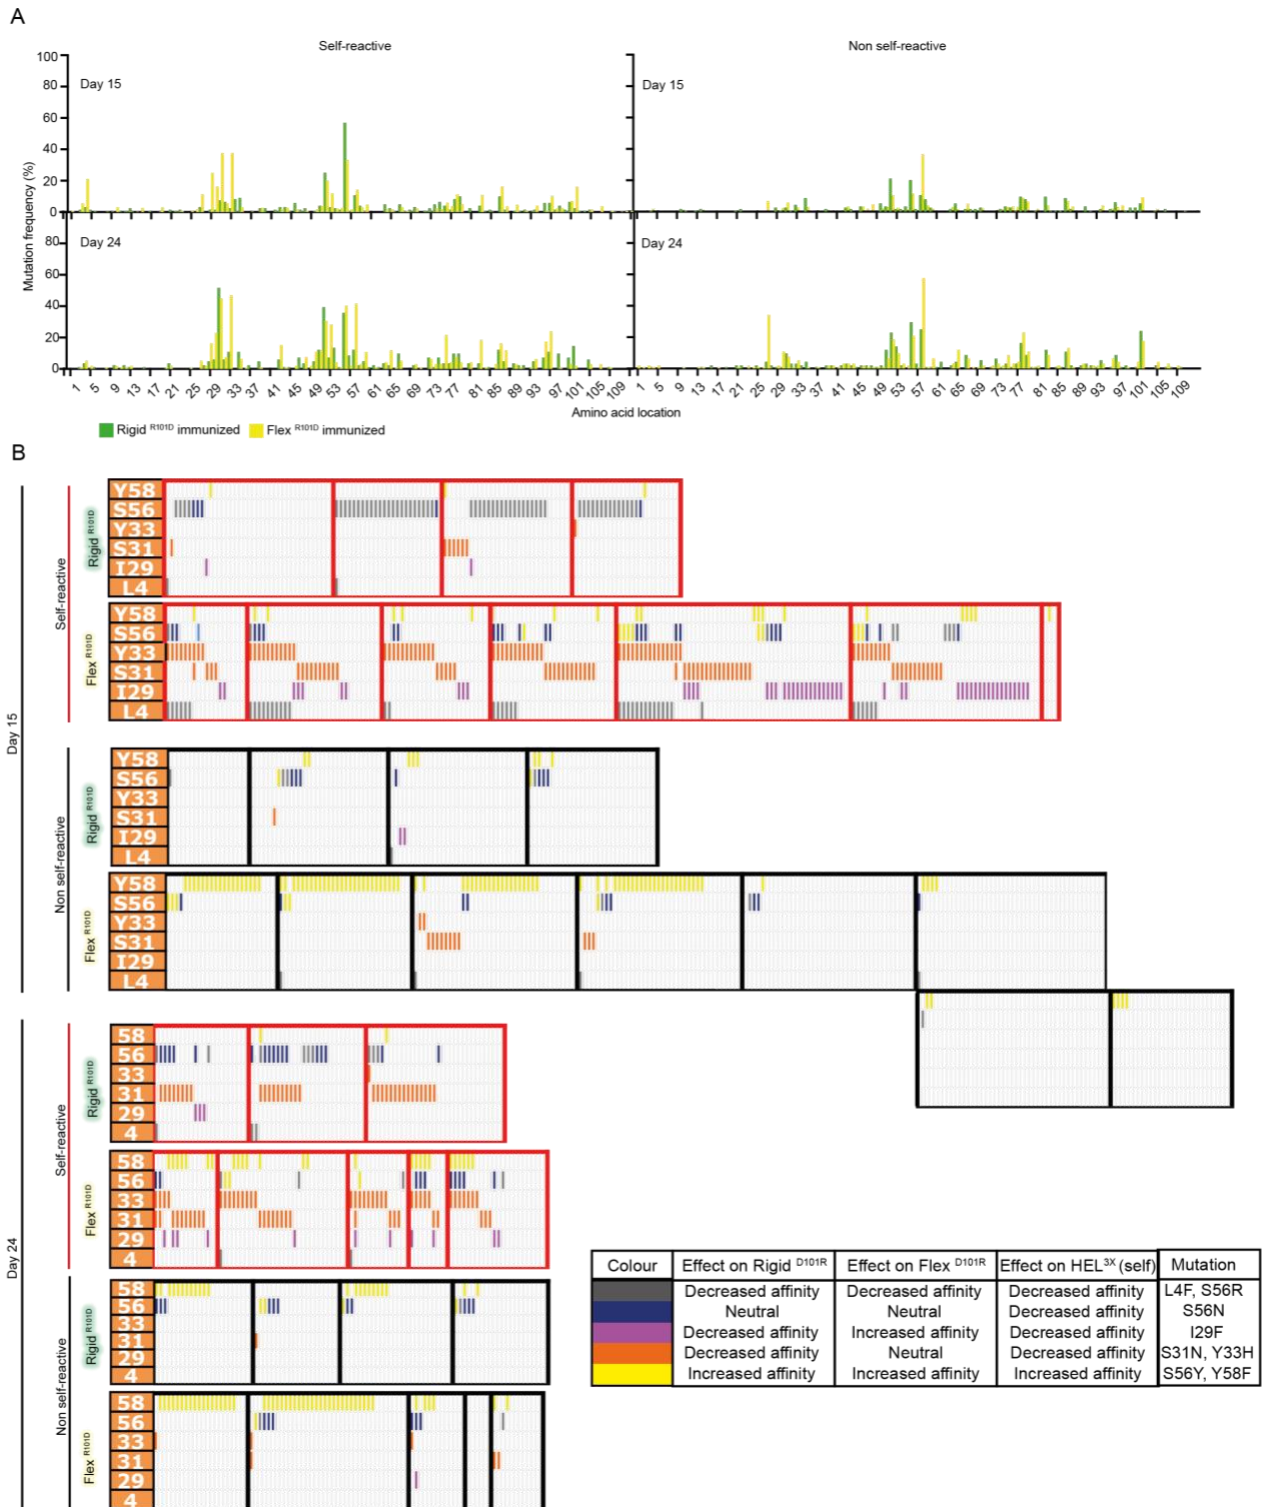

**Fig. S7. Antigen flexibility enables B cells to explore diverse mutational trajectories leading to loss of self-reactivity and high affinity for foreign antigen (II).** (A) The percentage of CD45.1+ GC B cells with substitutions at each H-chain amino acid at the indicated timepoints post antigen exposure. (B) Summary of mutations at H-chain positions L4, I29, S31, Y33, S56 and Y58 in individual sorted CD45.1+ GC B cells. Each column represents a single cell, each row denotes whether that cell has a mutation at the indicated amino acid position, and all the cells from a single

mouse are grouped within red or black boxes. Data representative of 2 independent experiments per timepoint with 2-3 mice per group.

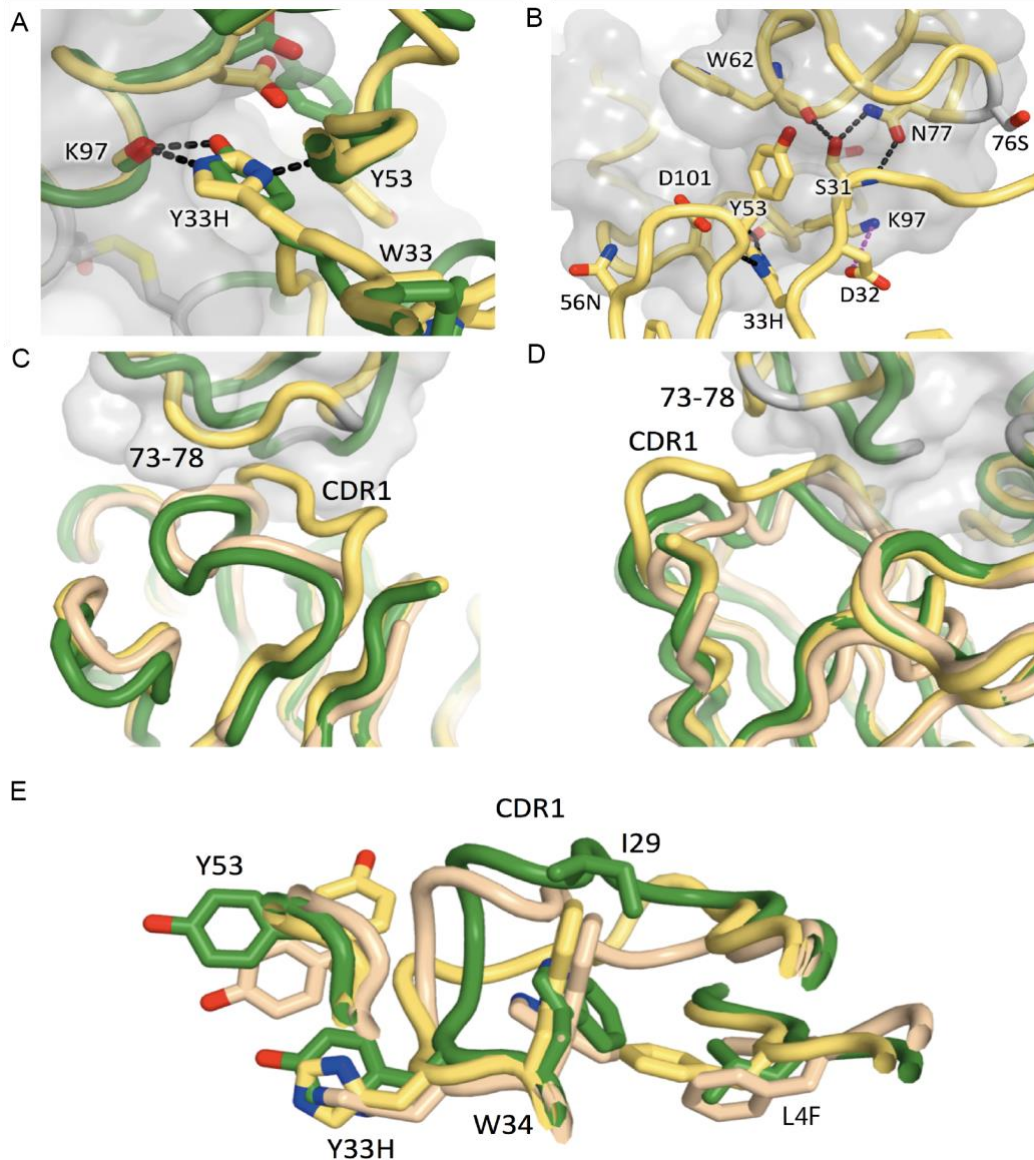

**Fig. S8. Structural details of the Hy10<sub>4x</sub>-Flex<sub>R101D</sub> complex (yellow), comparison with Hy10-Rigid<sub>R101D</sub> (green) and the unliganded Hy10<sub>4x</sub> structure (tan).** (A) The Hy10<sub>4x</sub>-Flex<sub>R101D</sub> complex is stabilized by Y33H forming two additional hydrogen bonds (black dashed lines), thereby linking antibody (Y53) and antigen (K97) backbones. (B) Additional hydrogen bonds connect Hy10<sub>4x</sub> and Flex<sub>R101D</sub>: (I) through the repositioned antibody residue S31 contacting W62 main-chain and N77 side-chain (antigen), (II) through an additional salt bridge (magenta dashed line) connecting D32 of Hy10<sub>4x</sub> and K97 of Flex<sub>R101D</sub>. (C-E) Structure of unliganded Hy10<sub>4x</sub> (tan) superposed onto the structures of Hy10-Rigid<sub>R101D</sub> (green) and Hy10<sub>4x</sub>-Flex<sub>R101D</sub> (yellow). Two perspectives are shown (C and D), with the 73-78 loop of lysozyme and CDRH1 of Hy10 highlighted. (E) Details of Hy10 interface focusing on framework mutation L4F and conformations of W34 and I29 of CDRH1. In the unliganded Hy10<sub>4x</sub> structure W34 can be modelled as a mix of two conformers, reflecting an overall intermediary conformation, with the positioning of L4F more reminiscent of the Hy10-Rigid<sub>R101D</sub> interaction and only partial rearrangement of antibody CDRH1 conformation in comparison to Hy10<sub>4x</sub>-Flex<sub>R101D</sub>.

| <b>Data collection statistics</b>                                      |                                             |                                              |                                              |                                             |
|------------------------------------------------------------------------|---------------------------------------------|----------------------------------------------|----------------------------------------------|---------------------------------------------|
| <b>Protein</b>                                                         | <b>HEL<sub>3X</sub></b>                     | <b>Hy10<sub>4X</sub></b>                     | <b>Flex R101D Hy10<sub>4X</sub></b>          | <b>Rigid R101D Hy10</b>                     |
| Wavelength                                                             | 0.9794                                      | 0.9537                                       | 0.9537                                       | 0.9537                                      |
| Spacegroup                                                             | P 4 <sub>3</sub> 2 <sub>1</sub> 2           | P 1 2 1                                      | P 1 2 <sub>1</sub> 1                         | P 1 2 <sub>1</sub> 1                        |
| Unit cell dimensions: a, b, c (Å); $\alpha$ , $\beta$ , $\gamma$ , (°) | 77.55, 77.55, 37.77;<br>90.00, 90.00, 90.00 | 68.56, 40.16, 93.65;<br>90.00, 107.57, 90.00 | 66.40, 65.72, 137.12;<br>90.00, 98.48, 90.00 | 63.62, 55.24, 74.23;<br>90.00, 90.46, 90.00 |
| Resolution range                                                       | 1.05-38.77<br>(1.05-1.07)                   | 1.85-46.47<br>(1.85-1.89)                    | 1.90-37.25<br>(1.90-1.93)                    | 2.20-48.50<br>(2.20-2.27)                   |
| Total reflections                                                      | 1294996 (61767)                             | 275598<br>(15523)                            | 620458<br>(27676)                            | 178665<br>(14648)                           |
| Unique reflections                                                     | 54091<br>(2610)                             | 42030<br>(2577)                              | 92222<br>(4546)                              | 26223<br>(2181)                             |
| Completeness                                                           | 100 (100)                                   | 100 (100)                                    | 99.9 (99.9)                                  | 99.4 (97.0)                                 |
| Multiplicity                                                           | 23.9 (23.7)                                 | 6.6 (6.0)                                    | 6.7 (6.1)                                    | 6.8 (6.7)                                   |
| Average (I/ $\sigma$ (I))                                              | 20.6 (4.5)                                  | 16.8 (2.0)                                   | 12.5 (2.2)                                   | 11.9 (2.7)                                  |
| Mean half set correlation, $CC_{1/2}$                                  | 0.998<br>(0.947)                            | 0.999<br>(0.778)                             | 0.998<br>(0.693)                             | 0.998<br>(0.899)                            |
| Rmeas (all I+ and I-)                                                  | 0.086<br>(0.637)                            | 0.056<br>(0.947)                             | 0.106<br>(0.927)                             | 0.102<br>(0.703)                            |
| Rpim (all I+ and I-)                                                   | 0.018<br>(0.132)                            | 0.022<br>(0.386)                             | 0.041<br>(0.373)                             | 0.039<br>(0.267)                            |
| Wilson B (Å <sup>2</sup> )                                             | 9.4                                         | 37.5                                         | 25.0                                         | 32.8                                        |
| <b>Refinement and model statistics</b>                                 |                                             |                                              |                                              |                                             |
| R <sub>work</sub> /R <sub>free</sub>                                   | 0.122/0.145                                 | 0.188/0.223                                  | 0.203/0.244                                  | 0.229/0.292                                 |
| Molecules/asu                                                          | 1*HEL                                       | 1*Fab                                        | 2*HEL-Fab                                    | 1*HEL-Fab                                   |
| Atoms protein                                                          | 1175                                        | 3221                                         | 8289                                         | 4196                                        |
| B average protein (Å <sup>2</sup> )                                    | 13.2                                        | 42.6                                         | 34.0                                         | 41.63                                       |
| Atoms water                                                            | 169                                         | 139                                          | 457                                          | 62                                          |
| B average water (Å <sup>2</sup> )                                      | 26.5                                        | 43.0                                         | 33.0                                         | 34.0                                        |
| RMSD bond lengths (Å)                                                  | 0.0102                                      | 0.0119                                       | 0.0093                                       | 0.0074                                      |
| RMSD bond angles (°)                                                   | 1.72                                        | 1.78                                         | 1.62                                         | 1.56                                        |
| Ramachandran Outliers (%)                                              | 0.00                                        | 0.48                                         | 0.38                                         | 0.37                                        |
| Ramachandran Favored (%)                                               | 97.6                                        | 96.86                                        | 96.25                                        | 97.43                                       |
| <b>PDB entry</b>                                                       | <b>6p4d</b>                                 | <b>6p4c</b>                                  | <b>6p4b</b>                                  | <b>6p4a</b>                                 |

**Table S1. Diffraction data and model refinement statistics.** Values in parentheses represent values for the highest resolution shell.

| HEL <sub>3x</sub> (self) affinities |                                  |                                                   |                                   |                                   |          |
|-------------------------------------|----------------------------------|---------------------------------------------------|-----------------------------------|-----------------------------------|----------|
| Hy10 variant                        | K <sub>D</sub> [M]               | k <sub>a</sub> [M <sup>-1</sup> s <sup>-1</sup> ] | k <sub>d</sub> [s <sup>-1</sup> ] | K <sub>A</sub> [M <sup>-1</sup> ] | Affinity |
| WT founder                          | 9.35x10 <sup>-8</sup>            | 1.25x10 <sup>5</sup>                              | 1.17x10 <sup>-2</sup>             | 1.07x10 <sup>7</sup>              | 94 nM    |
| L4F                                 | 2.49x10 <sup>-7</sup>            | 1.33x10 <sup>5</sup>                              | 3.30x10 <sup>-2</sup>             | 4.02x10 <sup>6</sup>              | 249 nM   |
| L4F/S31N                            | 2.43x10 <sup>-7</sup>            | 8.99x10 <sup>4</sup>                              | 2.19x10 <sup>-2</sup>             | 4.11x10 <sup>6</sup>              | 243 nM   |
| L4F/Y33H                            | 1.15x10 <sup>-6</sup>            | 1.65x10 <sup>5</sup>                              | 1.89x10 <sup>-1</sup>             | 8.71x10 <sup>5</sup>              | 1.15 μM  |
| L4F/Y33H/S56N                       | 3.70x10 <sup>-6</sup>            | 3.25x10 <sup>4</sup>                              | 1.20x10 <sup>-1</sup>             | 2.70x10 <sup>5</sup>              | 3.7 μM   |
| L4F/Y33H/S56N/Y58F                  | 1.85x10 <sup>-6</sup>            | 5.31x10 <sup>4</sup>                              | 9.83x10 <sup>-2</sup>             | 5.41x10 <sup>5</sup>              | 1.8 μM   |
| L4F/Y33H/S56R                       | 4.44x10 <sup>-6</sup>            | 2.20x10 <sup>4</sup>                              | 9.78x10 <sup>-2</sup>             | 2.25x10 <sup>5</sup>              | 4.4 μM   |
| L4F/Y33H/S56Y                       | 3.18x10 <sup>-6</sup>            | 3.17x10 <sup>4</sup>                              | 1.01x10 <sup>-1</sup>             | 3.15x10 <sup>5</sup>              | 3.2 μM   |
| L4F/Y33H/Y58F                       | 2.33x10 <sup>-6</sup>            | 4.43x10 <sup>4</sup>                              | 1.03x10 <sup>-1</sup>             | 4.29x10 <sup>5</sup>              | 2.3 μM   |
| I29F                                | 7.65x10 <sup>-7</sup>            | 1.04x10 <sup>5</sup>                              | 7.93x10 <sup>-2</sup>             | 1.31x10 <sup>6</sup>              | 765 nM   |
| I29F/S31N                           | 1.24x10 <sup>-6</sup>            | 6.31x10 <sup>4</sup>                              | 7.79x10 <sup>-2</sup>             | 8.10x10 <sup>5</sup>              | 1.2 μM   |
| I29F/S52T                           | 6.10x10 <sup>-7</sup>            | 6.98x10 <sup>4</sup>                              | 4.26x10 <sup>-2</sup>             | 1.64x10 <sup>6</sup>              | 610 nM   |
| I29F/S52T/Y53F                      | 8.07x10 <sup>-7</sup>            | 8.64x10 <sup>4</sup>                              | 6.97x10 <sup>-2</sup>             | 1.24x10 <sup>6</sup>              | 807 nM   |
| I29F/S52T/Y53F/Y58F                 | 1.48x10 <sup>-7</sup>            | 1.07x10 <sup>5</sup>                              | 1.58x10 <sup>-2</sup>             | 6.76x10 <sup>6</sup>              | 148 nM   |
| I29F/S52T/Y58F                      | 1.13x10 <sup>-7</sup>            | 1.14x10 <sup>5</sup>                              | 1.28x10 <sup>-2</sup>             | 8.88x10 <sup>6</sup>              | 113 nM   |
| I29F/Y53F                           | 7.98x10 <sup>-7</sup>            | 9.85x10 <sup>4</sup>                              | 7.86x10 <sup>-2</sup>             | 1.25x10 <sup>6</sup>              | 798 nM   |
| I29F/Y58F                           | 2.21x10 <sup>-7</sup>            | 1.14x10 <sup>5</sup>                              | 2.51x10 <sup>-2</sup>             | 4.53x10 <sup>6</sup>              | 221 nM   |
| I29F/S56N                           | 1.37x10 <sup>-6</sup>            | 3.63x10 <sup>4</sup>                              | 4.96x10 <sup>-2</sup>             | 7.33x10 <sup>5</sup>              | 1.4 μM   |
| S31N                                | 3.88x10 <sup>-7</sup>            | 1.16x10 <sup>5</sup>                              | 4.49x10 <sup>-2</sup>             | 2.58x10 <sup>6</sup>              | 388 nM   |
| S31N/S52R                           | Does not detectably bind at 5 μM |                                                   |                                   |                                   | N/A      |
| S31N/S52R/Y53F                      | Does not detectably bind at 5 μM |                                                   |                                   |                                   | N/A      |
| S31N/S56N                           | 3.62x10 <sup>-7</sup>            | 9.54x10 <sup>4</sup>                              | 3.46x10 <sup>-2</sup>             | 2.76x10 <sup>6</sup>              | 362 nM   |
| S31N/Y58F                           | 1.23x10 <sup>-7</sup>            | 1.23x10 <sup>5</sup>                              | 1.50x10 <sup>-2</sup>             | 8.15x10 <sup>6</sup>              | 123 nM   |
| Y33H                                | 2.35x10 <sup>-6</sup>            | 7.75x10 <sup>4</sup>                              | 1.82x10 <sup>-1</sup>             | 4.26x10 <sup>5</sup>              | 2.4 μM   |
| Y33H/S56N                           | 2.72x10 <sup>-6</sup>            | 5.49x10 <sup>4</sup>                              | 1.49x10 <sup>-1</sup>             | 3.67x10 <sup>5</sup>              | 2.7 μM   |
| Y33H/Y58F                           | 2.31x10 <sup>-6</sup>            | 8.32x10 <sup>4</sup>                              | 1.92x10 <sup>-1</sup>             | 4.34x10 <sup>5</sup>              | 2.3 μM   |
| S52R                                | Does not detectably bind at 5 μM |                                                   |                                   |                                   | N/A      |
| S52R/Y53F                           | Does not detectably bind at 5 μM |                                                   |                                   |                                   | N/A      |
| S52T                                | 1.67x10 <sup>-7</sup>            | 1.21x10 <sup>5</sup>                              | 2.03x10 <sup>-2</sup>             | 5.98x10 <sup>6</sup>              | 167 nM   |
| S52T/Y58F                           | 5.14x10 <sup>-8</sup>            | 1.89x10 <sup>5</sup>                              | 9.69x10 <sup>-3</sup>             | 1.95x10 <sup>7</sup>              | 51 nM    |
| S52T/Y53F                           | 1.52x10 <sup>-7</sup>            | 1.12x10 <sup>5</sup>                              | 1.71x10 <sup>-2</sup>             | 6.58x10 <sup>6</sup>              | 152 nM   |
| S52T/Y53F/Y58F                      | 2.44x10 <sup>-8</sup>            | 2.08x10 <sup>5</sup>                              | 5.07x10 <sup>-3</sup>             | 4.11x10 <sup>7</sup>              | 24 nM    |
| Y53D                                | 1.35x10 <sup>-9</sup>            | 1.08x10 <sup>5</sup>                              | 1.46x10 <sup>-4</sup>             | 7.42x10 <sup>8</sup>              | 1.4 nM   |
| Y53D/Y58F                           | 2.33x10 <sup>-10</sup>           | 1.10x10 <sup>5</sup>                              | 2.57x10 <sup>-5</sup>             | 4.29x10 <sup>9</sup>              | 233 pM   |
| Y53F                                | 1.64x10 <sup>-7</sup>            | 1.21x10 <sup>5</sup>                              | 1.98x10 <sup>-2</sup>             | 6.11x10 <sup>6</sup>              | 164 nM   |
| Y53F/S56R                           | 4.63x10 <sup>-7</sup>            | 8.25x10 <sup>4</sup>                              | 3.81x10 <sup>-2</sup>             | 2.16x10 <sup>6</sup>              | 463 nM   |
| Y53F/Y58F                           | 3.55x10 <sup>-8</sup>            | 9.55x10 <sup>4</sup>                              | 3.39x10 <sup>-2</sup>             | 2.82x10 <sup>7</sup>              | 36 nM    |
| S56N                                | 1.91x10 <sup>-7</sup>            | 9.96x10 <sup>4</sup>                              | 1.90x10 <sup>-2</sup>             | 5.23x10 <sup>6</sup>              | 191 nM   |
| S56N/Y58F                           | 2.23x10 <sup>-8</sup>            | 1.87x10 <sup>5</sup>                              | 4.17x10 <sup>-3</sup>             | 4.49x10 <sup>7</sup>              | 22 nM    |
| S56R                                | 8.09x10 <sup>-7</sup>            | 7.31x10 <sup>4</sup>                              | 5.92x10 <sup>-2</sup>             | 1.24x10 <sup>6</sup>              | 809 nM   |



|           |                       |                      |                       |                      |        |
|-----------|-----------------------|----------------------|-----------------------|----------------------|--------|
| S56Y      | 3.13x10 <sup>-8</sup> | 1.54x10 <sup>5</sup> | 4.81x10 <sup>-3</sup> | 3.19x10 <sup>7</sup> | 31 nM  |
| S56Y/Y58F | 8.31x10 <sup>-9</sup> | 1.79x10 <sup>5</sup> | 1.49x10 <sup>-3</sup> | 1.20x10 <sup>8</sup> | 8.3 nM |
| Y58F      | 3.76x10 <sup>-8</sup> | 1.93x10 <sup>5</sup> | 7.24x10 <sup>-3</sup> | 2.66x10 <sup>7</sup> | 38 nM  |

| <b>DEL affinities</b> |                                  |                                                     |                                       |                                       |                 |
|-----------------------|----------------------------------|-----------------------------------------------------|---------------------------------------|---------------------------------------|-----------------|
| <b>Hy10 variant</b>   | <b>K<sub>D</sub> [M]</b>         | <b>k<sub>a</sub> [M<sup>-1</sup>s<sup>-1</sup>]</b> | <b>k<sub>d</sub> [s<sup>-1</sup>]</b> | <b>K<sub>A</sub> [M<sup>-1</sup>]</b> | <b>Affinity</b> |
| WT founder            | 4.01x10 <sup>-8</sup>            | 1.85x10 <sup>5</sup>                                | 7.40x10 <sup>-3</sup>                 | 2.49x10 <sup>7</sup>                  | 40 nM           |
| L4F                   | 3.08x10 <sup>-7</sup>            | 8.71x10 <sup>4</sup>                                | 2.68x10 <sup>-2</sup>                 | 3.25x10 <sup>6</sup>                  | 308 nM          |
| L4F/Y33H              | 1.72x10 <sup>-7</sup>            | 1.22x10 <sup>5</sup>                                | 2.11x10 <sup>-2</sup>                 | 5.80x10 <sup>6</sup>                  | 172 nM          |
| I29F                  | 1.57x10 <sup>-8</sup>            | 1.76x10 <sup>5</sup>                                | 2.76x10 <sup>-3</sup>                 | 6.37x10 <sup>7</sup>                  | 16 nM           |
| I29F/S52T             | 5.79x10 <sup>-9</sup>            | 1.55x10 <sup>5</sup>                                | 8.97x10 <sup>-4</sup>                 | 1.73x10 <sup>8</sup>                  | 5.8 nM          |
| I29F/S52T/Y53F        | 1.64x10 <sup>-10</sup>           | 3.18x10 <sup>5</sup>                                | 5.22x10 <sup>-5</sup>                 | 6.10x10 <sup>9</sup>                  | 164 pM          |
| I29F/S52T/Y53F/Y58F   | 1.33x10 <sup>-10</sup>           | 2.10x10 <sup>5</sup>                                | 2.79x10 <sup>-5</sup>                 | 7.51x10 <sup>9</sup>                  | 133 pM          |
| I29F/S52T/Y58F        | 1.69x10 <sup>-9</sup>            | 1.91x10 <sup>5</sup>                                | 3.22x10 <sup>-4</sup>                 | 5.92x10 <sup>8</sup>                  | 1.7 nM          |
| I29F/Y53F             | 1.03x10 <sup>-9</sup>            | 1.47x10 <sup>5</sup>                                | 1.52x10 <sup>-4</sup>                 | 9.70x10 <sup>8</sup>                  | 1.0 nM          |
| S31N                  | 1.04x10 <sup>-7</sup>            | 1.33x10 <sup>5</sup>                                | 1.39x10 <sup>-2</sup>                 | 9.60x10 <sup>6</sup>                  | 104 nM          |
| Y33H                  | 5.94x10 <sup>-7</sup>            | 7.18x10 <sup>4</sup>                                | 4.26x10 <sup>-2</sup>                 | 1.68x10 <sup>6</sup>                  | 594 nM          |
| S52R                  | Does not detectably bind at 5 μM |                                                     |                                       |                                       | N/A             |
| S52R/Y53F             | Does not detectably bind at 5 μM |                                                     |                                       |                                       | N/A             |
| S52T                  | 3.35x10 <sup>-8</sup>            | 1.73x10 <sup>5</sup>                                | 5.79x10 <sup>-3</sup>                 | 2.98x10 <sup>7</sup>                  | 34 nM           |
| S52T/Y58F             | 2.62x10 <sup>-9</sup>            | 1.74x10 <sup>5</sup>                                | 4.58x10 <sup>-4</sup>                 | 3.80x10 <sup>8</sup>                  | 2.6 nM          |
| S52T/Y53F             | 3.56x10 <sup>-9</sup>            | 2.00x10 <sup>5</sup>                                | 7.11x10 <sup>-4</sup>                 | 2.81x10 <sup>8</sup>                  | 3.6 nM          |
| S52T/Y53F/Y58F        | 5.02x10 <sup>-10</sup>           | 2.54x10 <sup>5</sup>                                | 1.27x10 <sup>-4</sup>                 | 1.99x10 <sup>9</sup>                  | 502 pM          |
| Y53F                  | 8.35x10 <sup>-9</sup>            | 2.18x10 <sup>5</sup>                                | 1.82x10 <sup>-3</sup>                 | 1.20x10 <sup>8</sup>                  | 8.4 nM          |
| Y53F/S56R             | 2.68x10 <sup>-8</sup>            | 1.67x10 <sup>5</sup>                                | 4.49x10 <sup>-3</sup>                 | 3.73x10 <sup>7</sup>                  | 27 nM           |
| Y53F/Y58F             | 8.85x10 <sup>-9</sup>            | 1.22x10 <sup>5</sup>                                | 1.08x10 <sup>-3</sup>                 | 1.13x10 <sup>8</sup>                  | 8.9 nM          |
| S56R                  | 2.27x10 <sup>-7</sup>            | 1.31x10 <sup>5</sup>                                | 2.96x10 <sup>-2</sup>                 | 4.41x10 <sup>6</sup>                  | 227 nM          |
| Y58F                  | 1.07x10 <sup>-8</sup>            | 2.63x10 <sup>5</sup>                                | 2.81x10 <sup>-3</sup>                 | 9.35x10 <sup>7</sup>                  | 11 nM           |

| <b>Rigid<sub>R101D</sub> affinities</b> |                          |                                                     |                                       |                                       |                 |
|-----------------------------------------|--------------------------|-----------------------------------------------------|---------------------------------------|---------------------------------------|-----------------|
| <b>Hy10 variant</b>                     | <b>K<sub>D</sub> [M]</b> | <b>k<sub>a</sub> [M<sup>-1</sup>s<sup>-1</sup>]</b> | <b>k<sub>d</sub> [s<sup>-1</sup>]</b> | <b>K<sub>A</sub> [M<sup>-1</sup>]</b> | <b>Affinity</b> |
| WT founder                              | 7.36x10 <sup>-10</sup>   | 9.54x10 <sup>4</sup>                                | 7.02x10 <sup>-5</sup>                 | 1.36x10 <sup>9</sup>                  | 736 pM          |
| L4F                                     | 3.94x10 <sup>-9</sup>    | 1.04x10 <sup>5</sup>                                | 4.10x10 <sup>-4</sup>                 | 2.54x10 <sup>8</sup>                  | 3.9 nM          |
| L4F/Y33H                                | 1.14x10 <sup>-8</sup>    | 1.22x10 <sup>5</sup>                                | 1.38x10 <sup>-3</sup>                 | 8.77x10 <sup>7</sup>                  | 11 nM           |
| L4F/Y33H/S56N                           | 3.07x10 <sup>-9</sup>    | 1.23x10 <sup>5</sup>                                | 3.78x10 <sup>-4</sup>                 | 3.26x10 <sup>8</sup>                  | 3.1 nM          |
| L4F/Y33H/S56N/Y58F                      | 9.76x10 <sup>-10</sup>   | 1.52x10 <sup>5</sup>                                | 1.48x10 <sup>-4</sup>                 | 1.02x10 <sup>9</sup>                  | 976 pM          |
| L4F/Y33H/S56R                           | 8.27x10 <sup>-9</sup>    | 1.43x10 <sup>5</sup>                                | 1.19x10 <sup>-3</sup>                 | 1.21x10 <sup>8</sup>                  | 8.3 nM          |
| L4F/Y33H/S56Y                           | 1.58x10 <sup>-9</sup>    | 1.50x10 <sup>5</sup>                                | 2.37x10 <sup>-4</sup>                 | 6.33x10 <sup>8</sup>                  | 1.6 nM          |
| L4F/Y33H/Y58F                           | 1.98x10 <sup>-9</sup>    | 1.15x10 <sup>5</sup>                                | 2.27x10 <sup>-4</sup>                 | 5.05x10 <sup>8</sup>                  | 2.0 nM          |
| I29F                                    | 4.77x10 <sup>-9</sup>    | 1.01x10 <sup>5</sup>                                | 4.83x10 <sup>-4</sup>                 | 2.10x10 <sup>8</sup>                  | 4.8 nM          |
| I29F/S31N                               | 5.35x10 <sup>-10</sup>   | 1.56x10 <sup>5</sup>                                | 8.35x10 <sup>-5</sup>                 | 1.87x10 <sup>9</sup>                  | 535 pM          |
| I29F/S56N                               | 5.76x10 <sup>-9</sup>    | 1.46x10 <sup>5</sup>                                | 8.39x10 <sup>-4</sup>                 | 1.74x10 <sup>8</sup>                  | 5.8 nM          |
| I29F/Y58F                               | 1.27x10 <sup>-9</sup>    | 1.19x10 <sup>5</sup>                                | 1.50x10 <sup>-4</sup>                 | 7.87x10 <sup>8</sup>                  | 1.3 nM          |
| S31N                                    | 8.10x10 <sup>-9</sup>    | 7.72x10 <sup>4</sup>                                | 6.26x10 <sup>-4</sup>                 | 1.23x10 <sup>8</sup>                  | 8.1 nM          |
| Y33H                                    | 5.01x10 <sup>-8</sup>    | 9.36x10 <sup>4</sup>                                | 4.69x10 <sup>-3</sup>                 | 2.00x10 <sup>7</sup>                  | 50 nM           |
| Y33H/S56N                               | 1.24x10 <sup>-8</sup>    | 1.68x10 <sup>5</sup>                                | 2.08x10 <sup>-3</sup>                 | 8.06x10 <sup>7</sup>                  | 12 nM           |
| S56N                                    | 8.13x10 <sup>-10</sup>   | 1.82x10 <sup>5</sup>                                | 1.48x10 <sup>-4</sup>                 | 1.23x10 <sup>9</sup>                  | 813 pM          |
| S56N/Y58F                               | 9.54x10 <sup>-11</sup>   | 2.63x10 <sup>5</sup>                                | 2.50x10 <sup>-5</sup>                 | 1.05x10 <sup>10</sup>                 | 95 pM           |
| S56R                                    | 3.71x10 <sup>-9</sup>    | 2.04x10 <sup>5</sup>                                | 7.56x10 <sup>-4</sup>                 | 2.70x10 <sup>8</sup>                  | 3.7 nM          |
| S56Y                                    | 4.90x10 <sup>-10</sup>   | 1.71x10 <sup>5</sup>                                | 8.36x10 <sup>-5</sup>                 | 2.04x10 <sup>9</sup>                  | 490 pM          |
| S56Y/Y58F                               | 4.59x10 <sup>-10</sup>   | 1.69x10 <sup>5</sup>                                | 7.75x10 <sup>-5</sup>                 | 2.18x10 <sup>9</sup>                  | 459 pM          |
| Y58F                                    | 1.02x10 <sup>-10</sup>   | 1.89x10 <sup>5</sup>                                | 1.93x10 <sup>-5</sup>                 | 9.80x10 <sup>9</sup>                  | 102 pM          |

| FlexR101D affinities |                        |                                                   |                                   |                                   |          |
|----------------------|------------------------|---------------------------------------------------|-----------------------------------|-----------------------------------|----------|
| Hy10 variant         | K <sub>D</sub> [M]     | k <sub>a</sub> [M <sup>-1</sup> s <sup>-1</sup> ] | k <sub>d</sub> [s <sup>-1</sup> ] | K <sub>A</sub> [M <sup>-1</sup> ] | Affinity |
| WT founder           | 6.42x10 <sup>-8</sup>  | 9.91x10 <sup>4</sup>                              | 6.36x10 <sup>-3</sup>             | 1.56x10 <sup>7</sup>              | 64 nM    |
| L4F                  | 1.50x10 <sup>-7</sup>  | 8.83x10 <sup>4</sup>                              | 1.33x10 <sup>-2</sup>             | 6.65x10 <sup>6</sup>              | 150 nM   |
| L4F/S31N             | 9.22x10 <sup>-8</sup>  | 1.66x10 <sup>5</sup>                              | 1.53x10 <sup>-2</sup>             | 1.08x10 <sup>7</sup>              | 92 nM    |
| L4F/Y33H             | 9.29x10 <sup>-9</sup>  | 9.06x10 <sup>4</sup>                              | 8.42x10 <sup>-4</sup>             | 1.08x10 <sup>8</sup>              | 9.3 nM   |
| L4F/Y33H/S56N        | 9.21x10 <sup>-9</sup>  | 9.18x10 <sup>4</sup>                              | 8.45x10 <sup>-4</sup>             | 1.09x10 <sup>8</sup>              | 9.2 nM   |
| L4F/Y33H/S56N/Y58F   | 9.58x10 <sup>-10</sup> | 1.53x10 <sup>5</sup>                              | 1.47x10 <sup>-4</sup>             | 1.04x10 <sup>9</sup>              | 958 pM   |
| L4F/Y33H/S56R        | 1.42x10 <sup>-8</sup>  | 1.60x10 <sup>5</sup>                              | 2.27x10 <sup>-3</sup>             | 7.05x10 <sup>7</sup>              | 14 nM    |
| L4F/Y33H/S56Y        | 3.32x10 <sup>-9</sup>  | 1.58x10 <sup>5</sup>                              | 5.24x10 <sup>-4</sup>             | 3.01x10 <sup>8</sup>              | 3.3 nM   |
| L4F/Y33H/Y58F        | 2.94x10 <sup>-9</sup>  | 1.02x10 <sup>5</sup>                              | 3.00x10 <sup>-4</sup>             | 3.40x10 <sup>8</sup>              | 2.9 nM   |
| I29F                 | 4.20x10 <sup>-8</sup>  | 1.18x10 <sup>5</sup>                              | 4.93x10 <sup>-3</sup>             | 2.38x10 <sup>7</sup>              | 42 nM    |
| I29F/S31N            | 1.47x10 <sup>-8</sup>  | 2.39x10 <sup>5</sup>                              | 3.52x10 <sup>-3</sup>             | 6.79x10 <sup>7</sup>              | 15 nM    |
| I29F/S52T            | 1.04x10 <sup>-7</sup>  | 8.18x10 <sup>4</sup>                              | 8.49x10 <sup>-3</sup>             | 9.63x10 <sup>6</sup>              | 104 nM   |
| I29F/S52T/Y53F       | 1.77x10 <sup>-8</sup>  | 1.33x10 <sup>5</sup>                              | 2.35x10 <sup>-3</sup>             | 5.65x10 <sup>7</sup>              | 18 nM    |
| I29F/Y53F            | 4.37x10 <sup>-8</sup>  | 1.03x10 <sup>5</sup>                              | 4.50x10 <sup>-3</sup>             | 2.29x10 <sup>7</sup>              | 44 nM    |
| I29F/S56N            | 4.13x10 <sup>-8</sup>  | 1.28x10 <sup>5</sup>                              | 5.27x10 <sup>-3</sup>             | 2.42x10 <sup>7</sup>              | 41 nM    |
| I29F/Y58F            | 2.71x10 <sup>-8</sup>  | 8.77x10 <sup>4</sup>                              | 2.37x10 <sup>-3</sup>             | 3.70x10 <sup>7</sup>              | 27 nM    |
| S31N                 | 6.49x10 <sup>-8</sup>  | 1.18x10 <sup>5</sup>                              | 7.67x10 <sup>-3</sup>             | 1.54x10 <sup>7</sup>              | 65 nM    |
| S31N/S56N            | 5.97x10 <sup>-8</sup>  | 2.60x10 <sup>5</sup>                              | 1.55x10 <sup>-2</sup>             | 1.68x10 <sup>7</sup>              | 60 nM    |
| S31N/Y58F            | 2.31x10 <sup>-8</sup>  | 2.12x10 <sup>5</sup>                              | 4.89x10 <sup>-3</sup>             | 4.33x10 <sup>7</sup>              | 23 nM    |
| Y33H                 | 5.29x10 <sup>-8</sup>  | 1.01x10 <sup>5</sup>                              | 5.32x10 <sup>-3</sup>             | 1.89x10 <sup>7</sup>              | 53 nM    |
| Y33H/S56N            | 4.67x10 <sup>-8</sup>  | 8.74x10 <sup>4</sup>                              | 4.08x10 <sup>-3</sup>             | 2.14x10 <sup>7</sup>              | 47 nM    |
| Y33H/Y58F            | 1.45x10 <sup>-8</sup>  | 2.11x10 <sup>5</sup>                              | 3.06x10 <sup>-3</sup>             | 6.88x10 <sup>7</sup>              | 15 nM    |
| S52T                 | 8.37x10 <sup>-8</sup>  | 2.38x10 <sup>5</sup>                              | 1.99x10 <sup>-2</sup>             | 1.19x10 <sup>7</sup>              | 84 nM    |
| S52T/Y58F            | 3.46x10 <sup>-8</sup>  | 1.12x10 <sup>5</sup>                              | 3.86x10 <sup>-3</sup>             | 2.89x10 <sup>7</sup>              | 35 nM    |
| S52T/Y53F            | 4.30x10 <sup>-8</sup>  | 1.21x10 <sup>5</sup>                              | 5.20x10 <sup>-3</sup>             | 2.32x10 <sup>7</sup>              | 43 nM    |
| S52T/Y53F/Y58F       | 1.45x10 <sup>-8</sup>  | 1.77x10 <sup>5</sup>                              | 2.58x10 <sup>-3</sup>             | 6.88x10 <sup>7</sup>              | 15 nM    |
| S56N                 | 8.38x10 <sup>-8</sup>  | 1.24x10 <sup>5</sup>                              | 1.04x10 <sup>-2</sup>             | 1.19x10 <sup>7</sup>              | 84 nM    |
| S56N/Y58F            | 2.59x10 <sup>-8</sup>  | 1.32x10 <sup>5</sup>                              | 3.42x10 <sup>-3</sup>             | 3.86x10 <sup>7</sup>              | 26 nM    |
| S56R                 | 2.51x10 <sup>-7</sup>  | 7.81x10 <sup>4</sup>                              | 1.96x10 <sup>-2</sup>             | 3.98x10 <sup>6</sup>              | 251 nM   |
| S56Y                 | 2.77x10 <sup>-8</sup>  | 1.45x10 <sup>5</sup>                              | 4.01x10 <sup>-3</sup>             | 3.61x10 <sup>7</sup>              | 28 nM    |
| S56Y/Y58F            | 1.64x10 <sup>-8</sup>  | 1.01x10 <sup>5</sup>                              | 1.65x10 <sup>-3</sup>             | 6.12x10 <sup>7</sup>              | 16 nM    |
| Y58F                 | 1.72x10 <sup>-8</sup>  | 1.21x10 <sup>5</sup>                              | 2.08x10 <sup>-3</sup>             | 5.83x10 <sup>7</sup>              | 17 nM    |

**Table S2. Affinity of lysozyme antigen variants.**

Hy10 variants identified by single cell sequencing were expressed in a Fab format. Binding affinities of biotinylated Fab for soluble antigens (Self HEL<sub>3X</sub>, DEL, RigidR101D and FlexR101D) were determined Biolayer Interferometry (BLI) as previously described (14).

**Movie S1. Structural basis of autoantibody redemption against a flexible antigen.** The conformational differences observed between Rigid<sub>R101D</sub> (green) and Flex<sub>R101D</sub> (yellow) are enabled by the disulfide bond disruption due to C76S and C94S mutations. The altered antigen conformation is stabilized by the rearrangement of the CDR1 region of the antibody variable heavy domain (VH).

**Movie S2. Structural basis of autoantibody redemption against a flexible antigen.** This movie shows the conformational differences in the antibody paratope CDRH1 between the complex of Hy10 with Rigid<sub>R101D</sub> (green) and Hy10<sub>4X</sub> bound to Flex<sub>R101D</sub> (yellow), promoted by the antibody H-chain mutations L4F and Y33H and rotation of the side chain of conserved antibody H-chain residue W34.
